# Supplementary material
Source: Springer Nature journal article supplement (https://www.springermedizin.de/resource/supplementary/12885_2009_1803_MOESM1_ESM.pdf/9460742)

Log  $\gamma$ H2AX

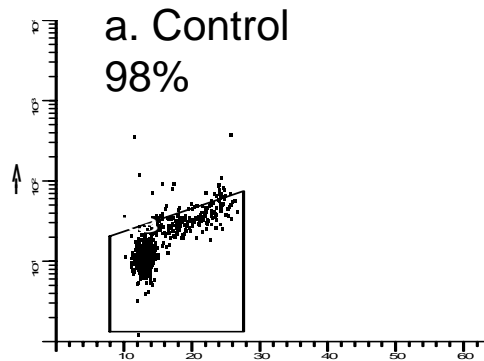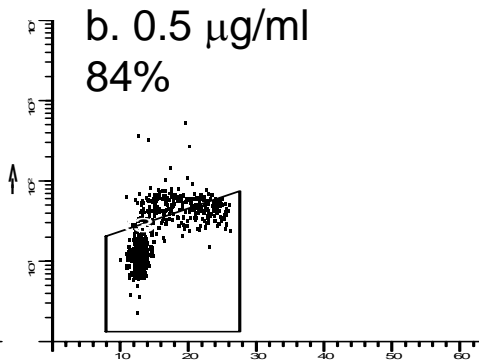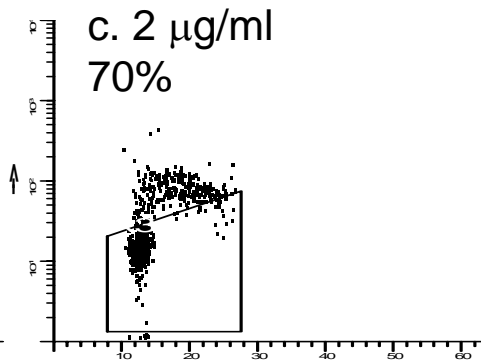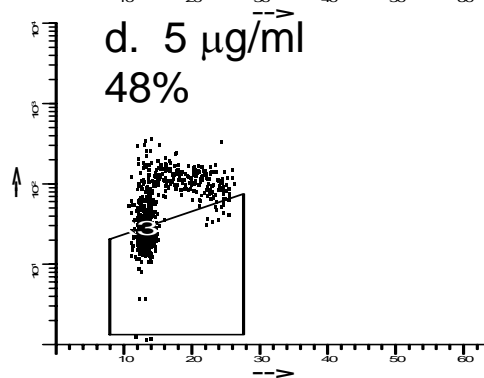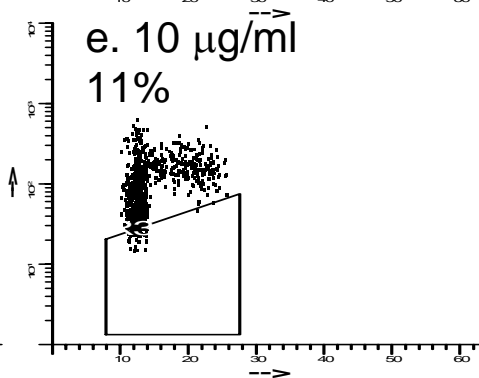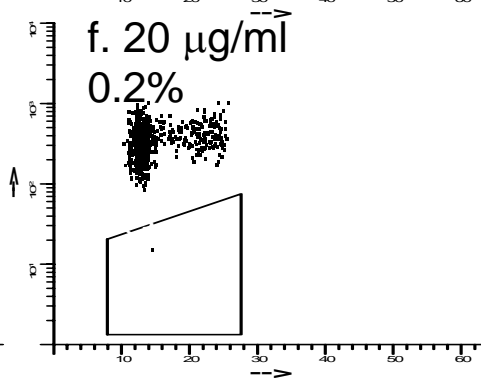

DNA Content

Supplement: MOESM1 [file 9460742]
